# Supplementary material for: Effect of Hydroxytyrosol Derivatives of Donepezil on the Activity of Enzymes Involved in Neurodegenerative Diseases and Oxidative Damage
Source: MDPI journal article supplement (doi:10.3390/molecules29020548), 2024-01-22

## Supplementary material

### **Effect of hydroxytyrosol derivatives of Donepezil on the activity of enzymes involved in neurodegenerative diseases and oxidative damage.**

**Antonio D'Errico<sup>1\*</sup>, Rosarita Nasso<sup>1\*</sup>, Rosario Rullo<sup>2\*</sup>, Jessica Maiuolo<sup>3</sup>, Paola Costanzo<sup>4</sup>, Sonia Bonacci<sup>5</sup>, Manuela Oliverio<sup>5</sup>, Emmanuele De Vendittis<sup>6</sup>, Mariorosario Masullo<sup>1</sup>, Rosaria Arcone<sup>1</sup>**

#### **Affiliations**

<sup>1</sup> Department of Medical, Movement and Well-Being Sciences, University of Naples "Parthenope", Via Medina, 40, 80133 Napoli, Italy.

<sup>2</sup> Institute for the Animal Production Systems in the Mediterranean Environment, CNR, Piazzale Enrico Fermi 1, 80055 Portici, Italy.

<sup>3</sup> Department of Health Science, Institute of Research for Food Safety & Health (IRC-FSH), University Magna Græcia of Catanzaro, Viale Europa, 88100 Catanzaro, Italy.

<sup>4</sup> Department of Chemistry and Chemical Technologies, University of Calabria, Via P. Bucci, Cubo 12C, 87036 Rende, Italy.

<sup>5</sup> Department of Health Sciences, University Magna Græcia of Catanzaro, Viale Europa, 88100 Catanzaro, Italy.

<sup>6</sup> Department of Molecular Medicine and Medical Biotechnology, University of Naples Federico II, Via S. Pansini 5, I-80131 Napoli, Italy.

\*Equally contributed to this work

Supplementary Figures S1 – S8: Representative experiments for the determination of the kinetic parameters of MAO-A or MAO-B activity.

Representative experiments for the determination of the kinetic parameters of MAO-A or MAO-B activity in the absence or in the presence of the indicated concentration of Donepezyl (Figure S1), HT1 (Figure S2), HT1a (Figure S3), HT2 (Figure S4), HT3 (Figure S5), HT3a (Figure S6), HT4 (Figure S7) or HT4a (Figure S8). The data were interpolated by non-linear fitting in the hyperbolic Michaelis Menten equation (panels A) or by linear fitting in the Lineweaver-Burk equation (panels B) using the Kaleidagraph application (Synergy) version 5.0.4 for Apple MacOS. Fitting parameters furnished by the application were reported at the bottom of each graph.

Figure S1\_A. Effect of Donepezyl on the kinetics data of MAO-A activity.

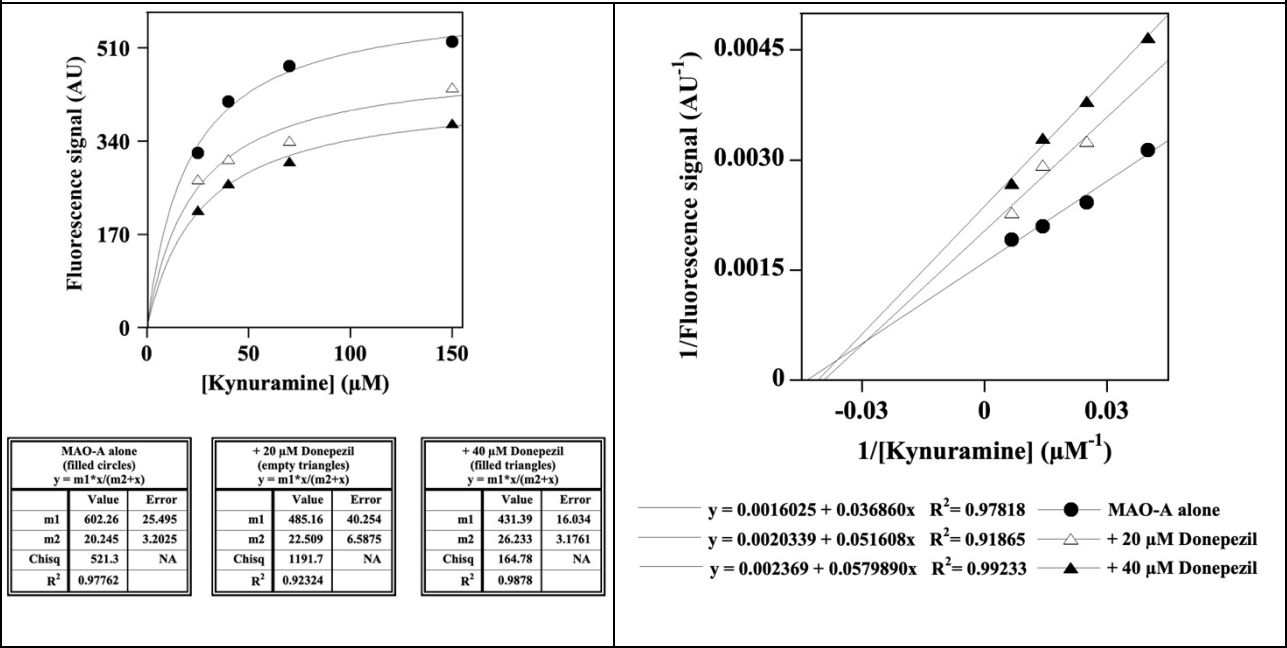

Figure S1\_B. Effect of Donepezyl on the kinetics data of MAO-B activity.

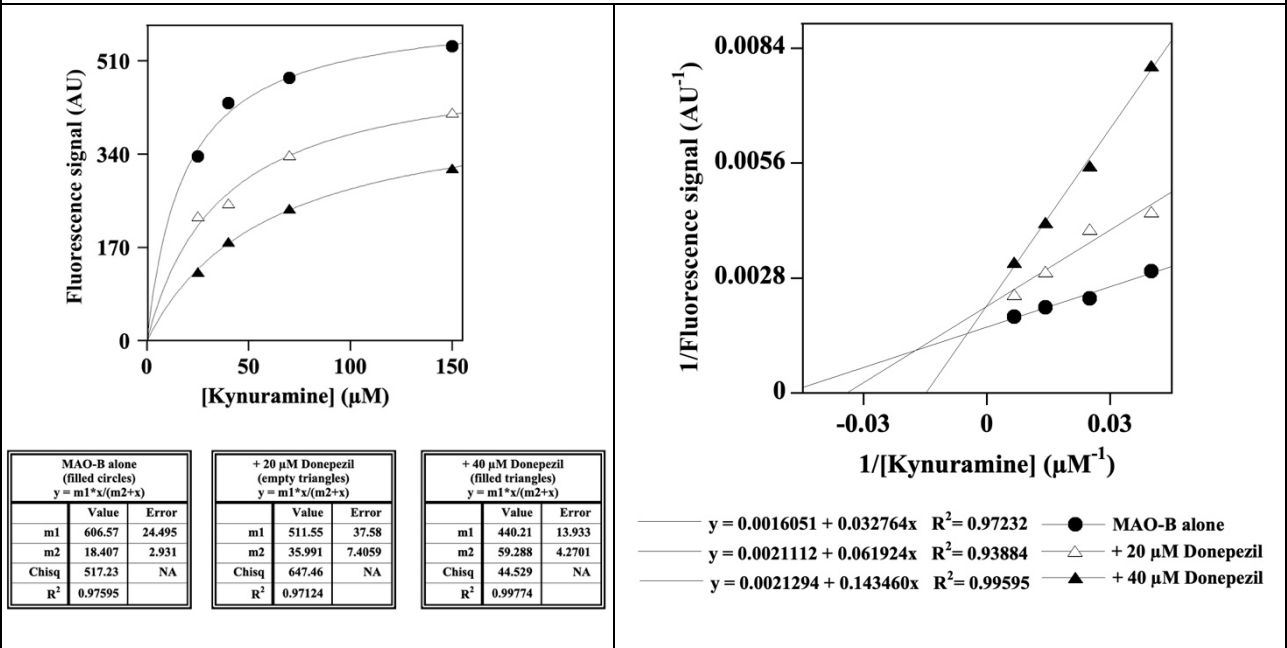

Figure S2\_A. Effect of HT1 on the kinetics data of MAO-A activity.

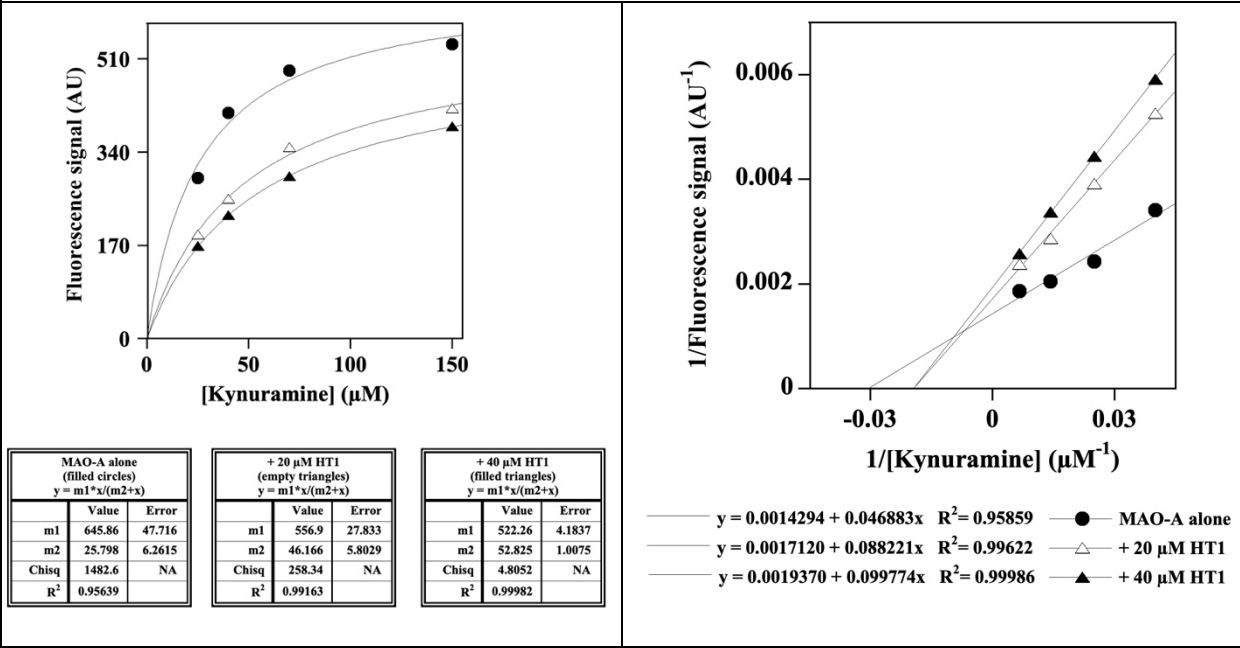

Figure S2\_B. Effect of HT1 on the kinetics data of MAO-B activity.

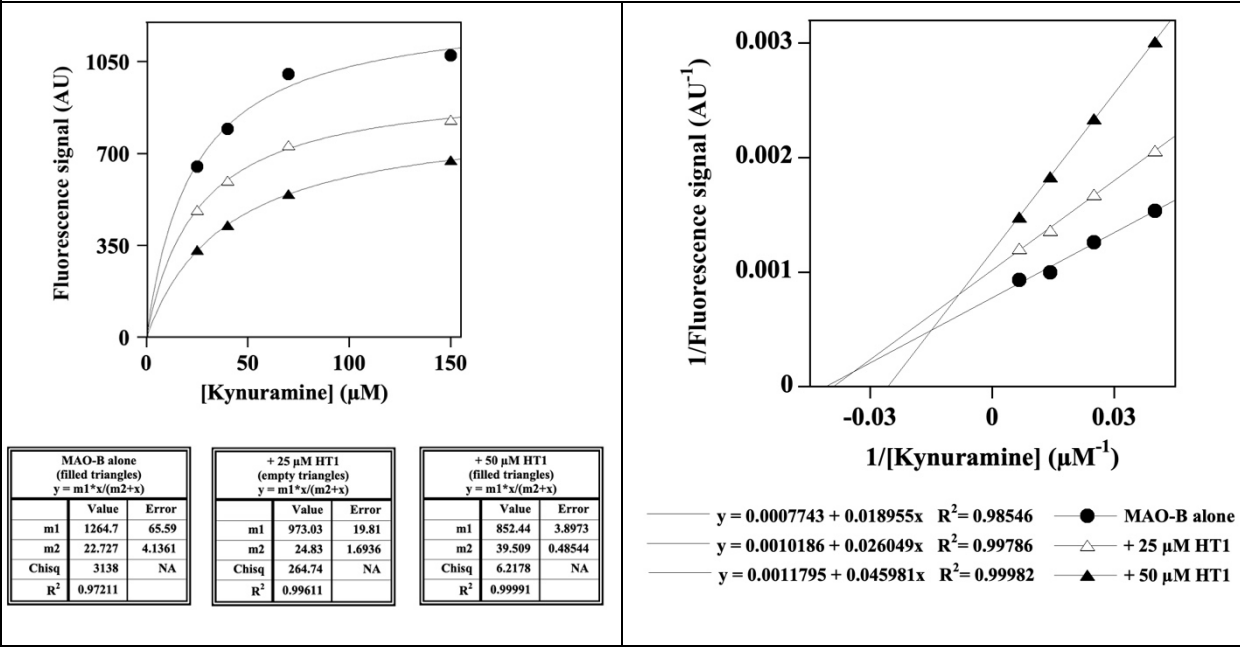

Figure S3\_A. Effect of HT1a on the kinetics data of MAO-A activity.

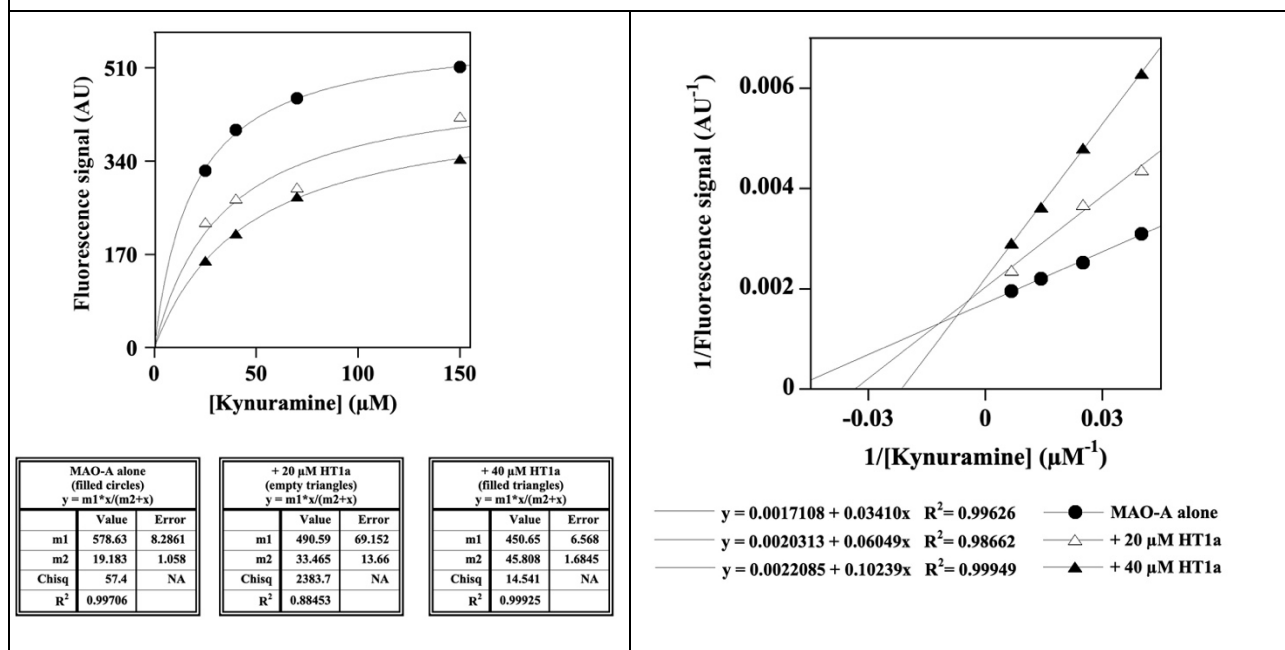

Figure S3\_B. Effect of HT1a on the kinetics data of MAO-B activity.

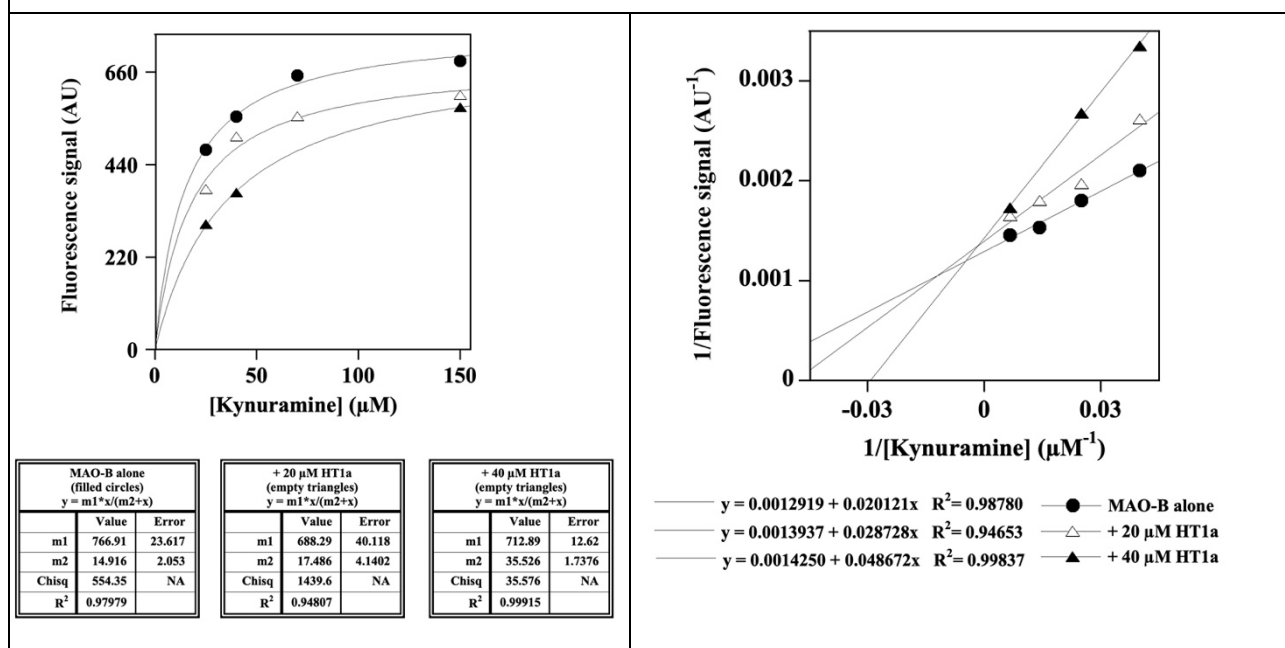

Figure S4\_A. Effect of HT2 on the kinetics data of MAO-A activity.

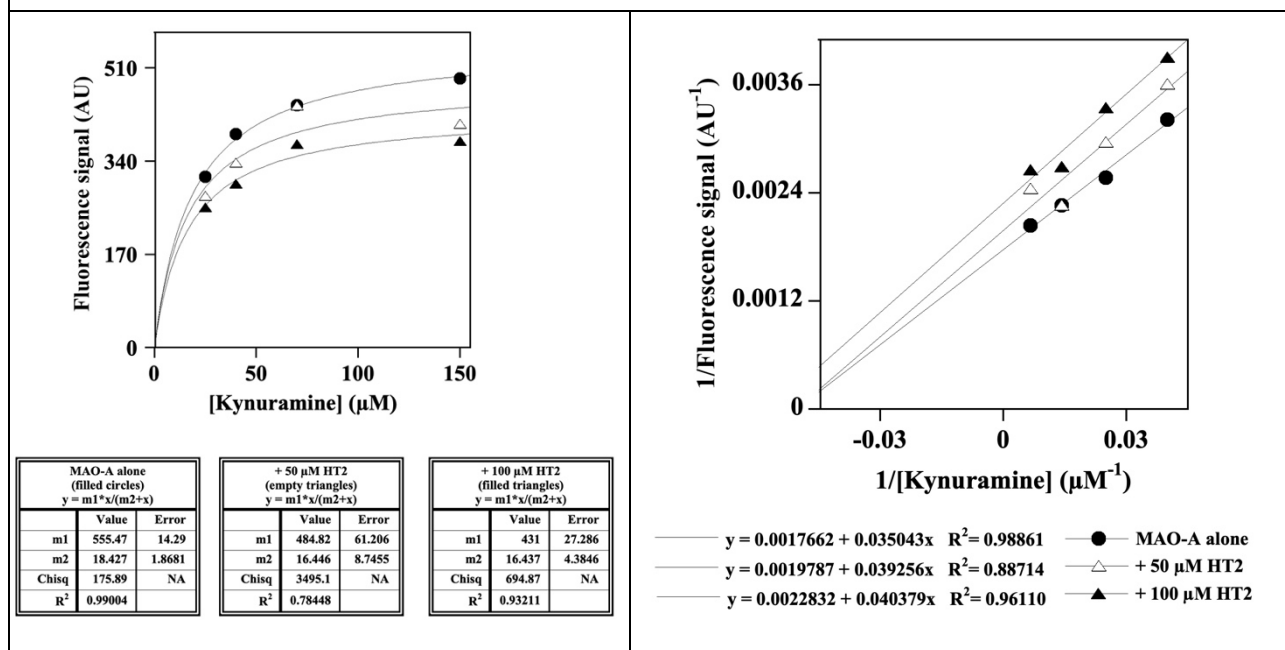

Figure S4\_B. Effect of HT2 on the kinetics data of MAO-B activity.

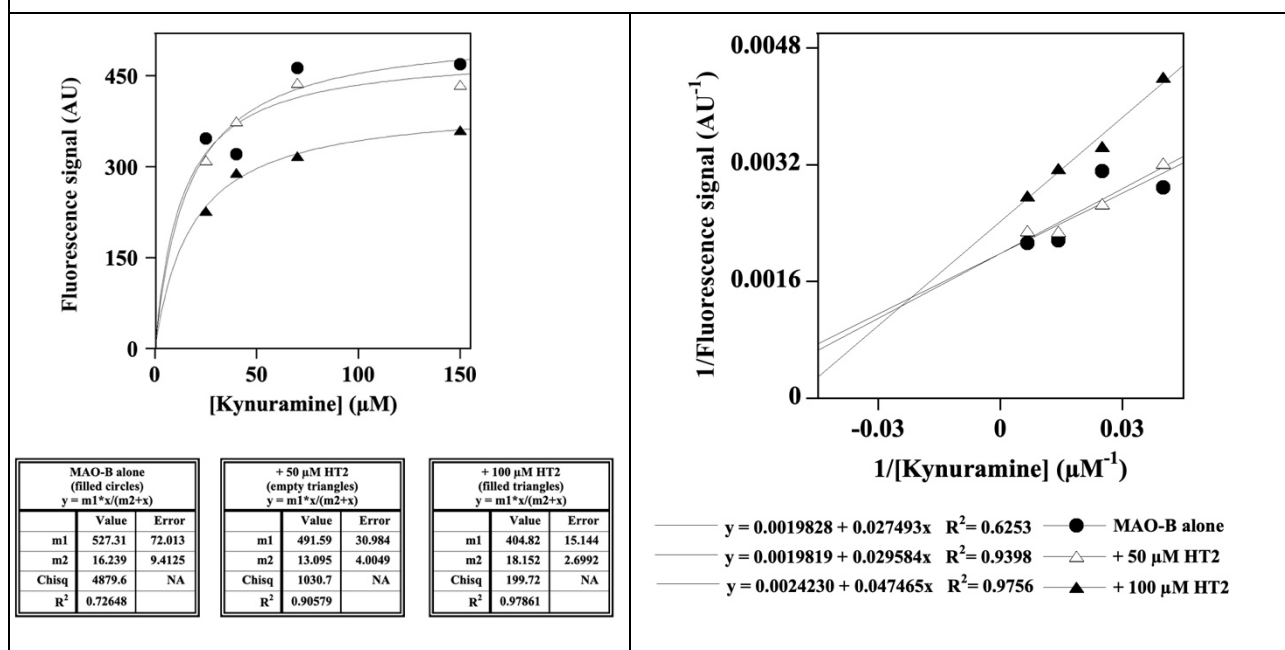

Figure S5\_A. Effect of HT3 on the kinetics data of MAO-A activity.

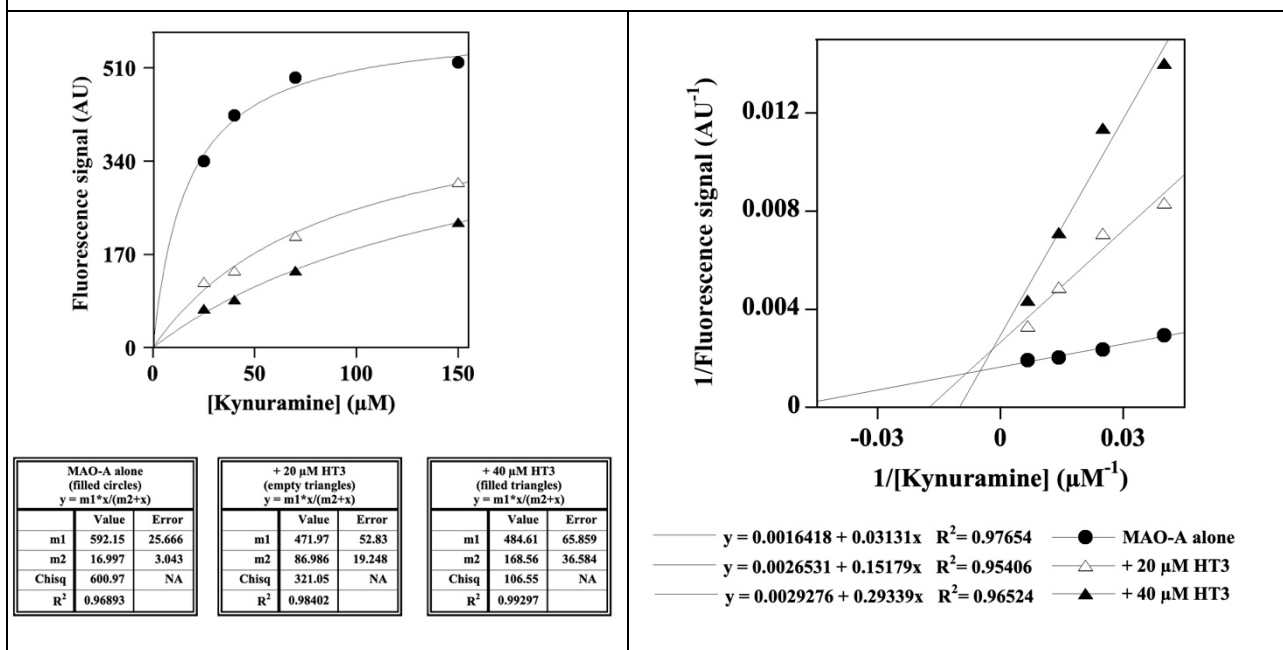

Figure S5\_B. Effect of HT3 on the kinetics data of MAO-B activity.

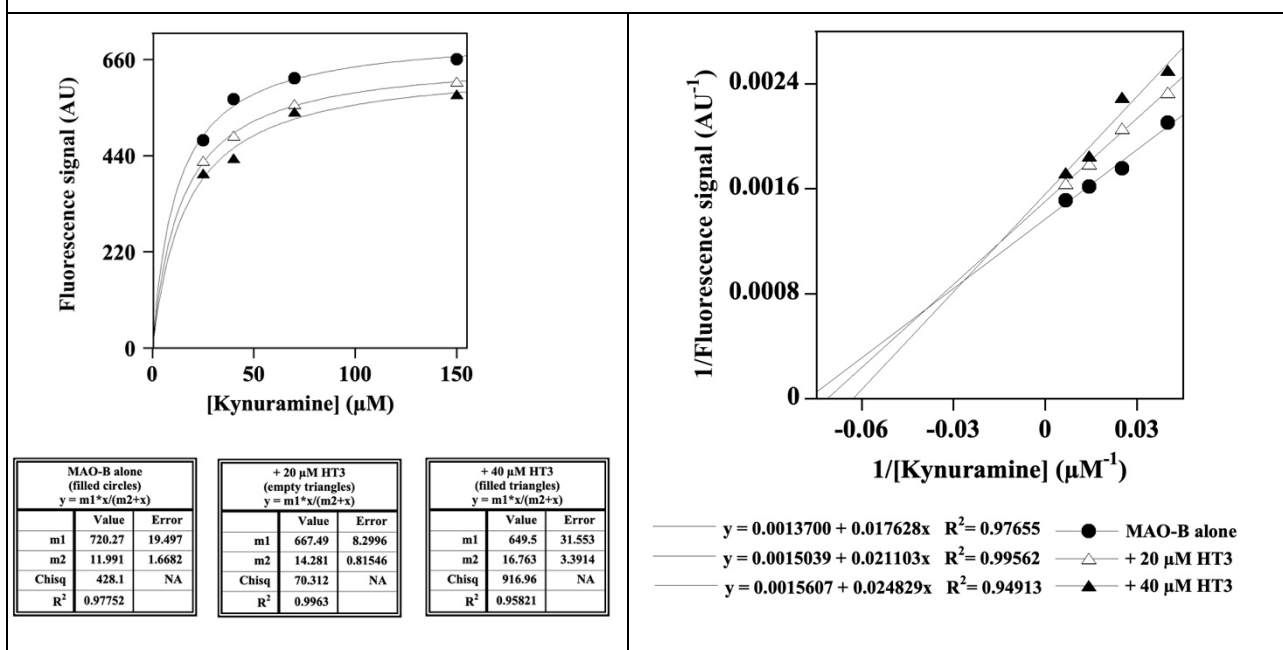

Figure S6\_A. Effect of HT3a on the kinetics data of MAO-A activity.

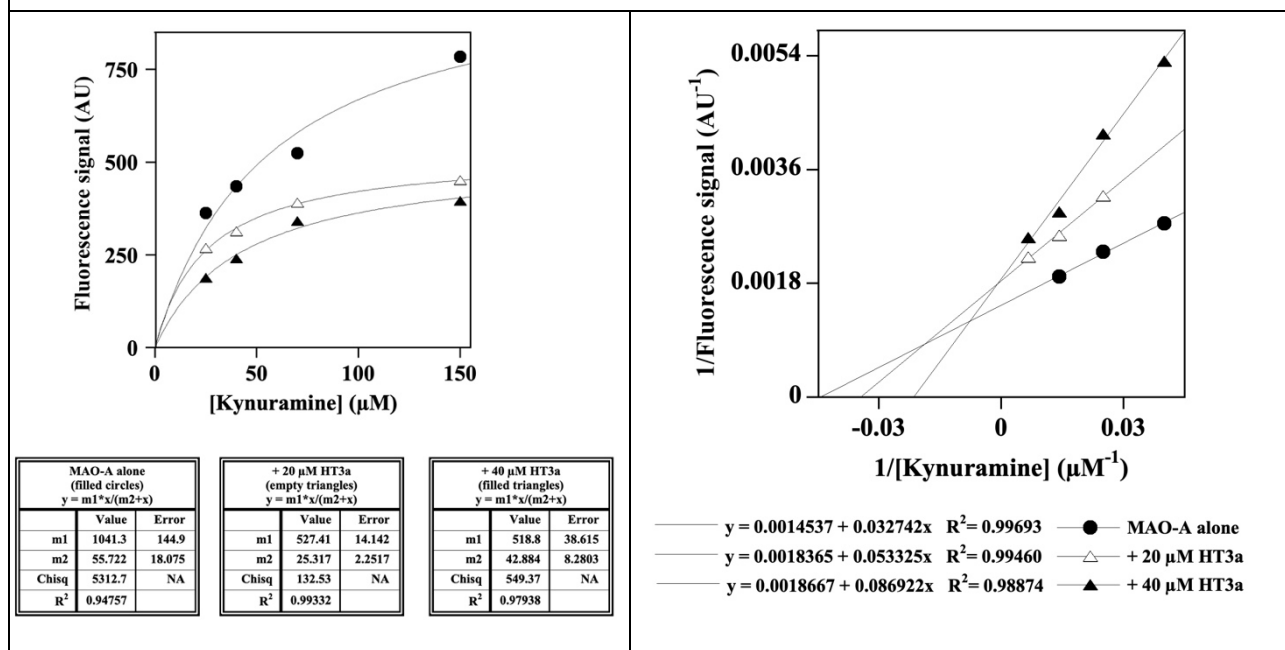

Figure S6\_B. Effect of HT3a on the kinetics data of MAO-B activity.

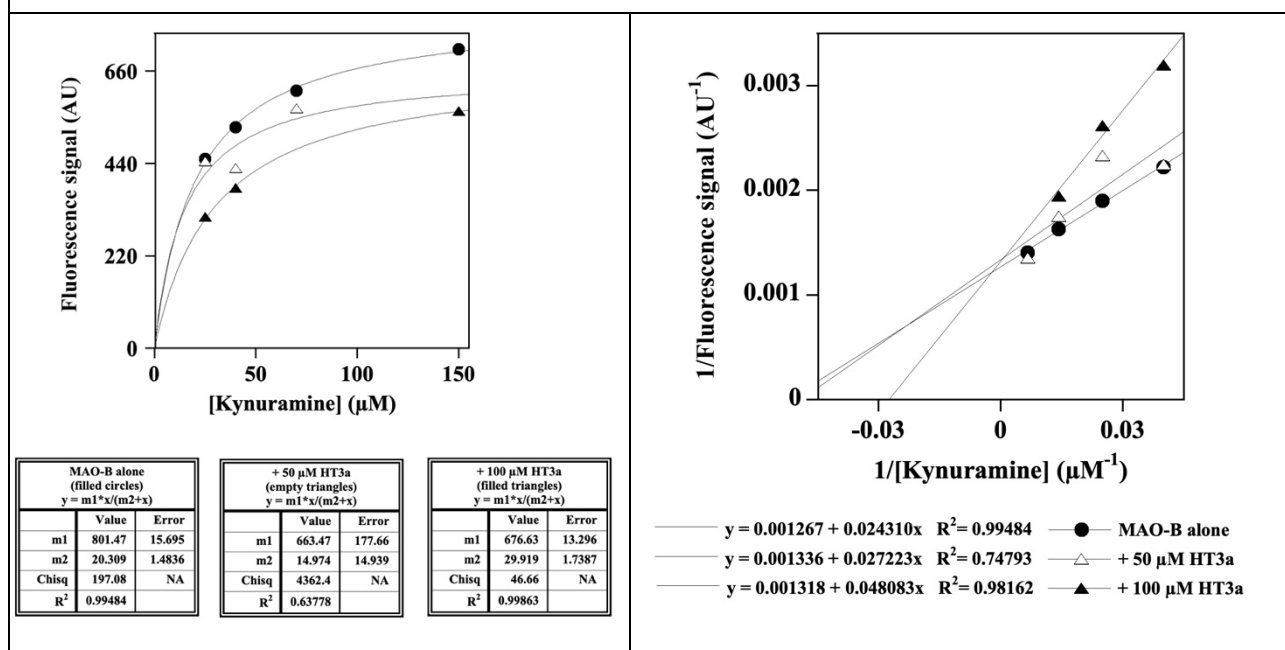



Figure S7\_A. Effect of HT4 on the kinetics data of MAO-A activity.

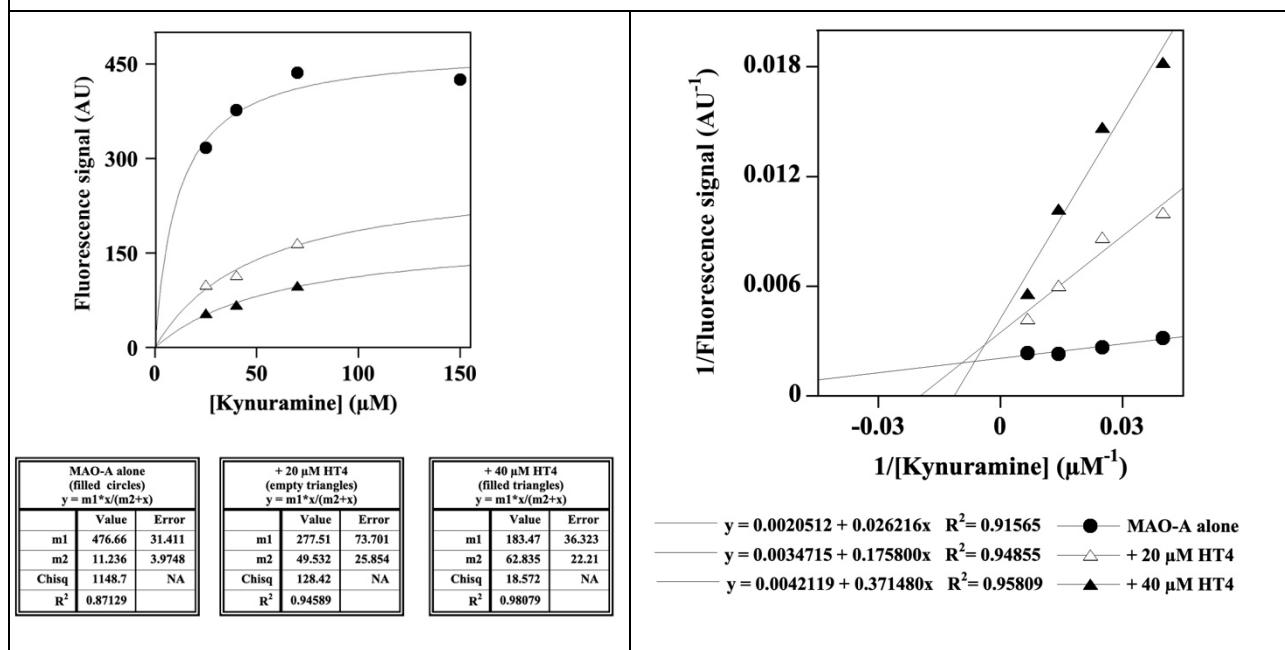

Figure S7\_B. Effect of HT4 on the kinetics data of MAO-B activity.

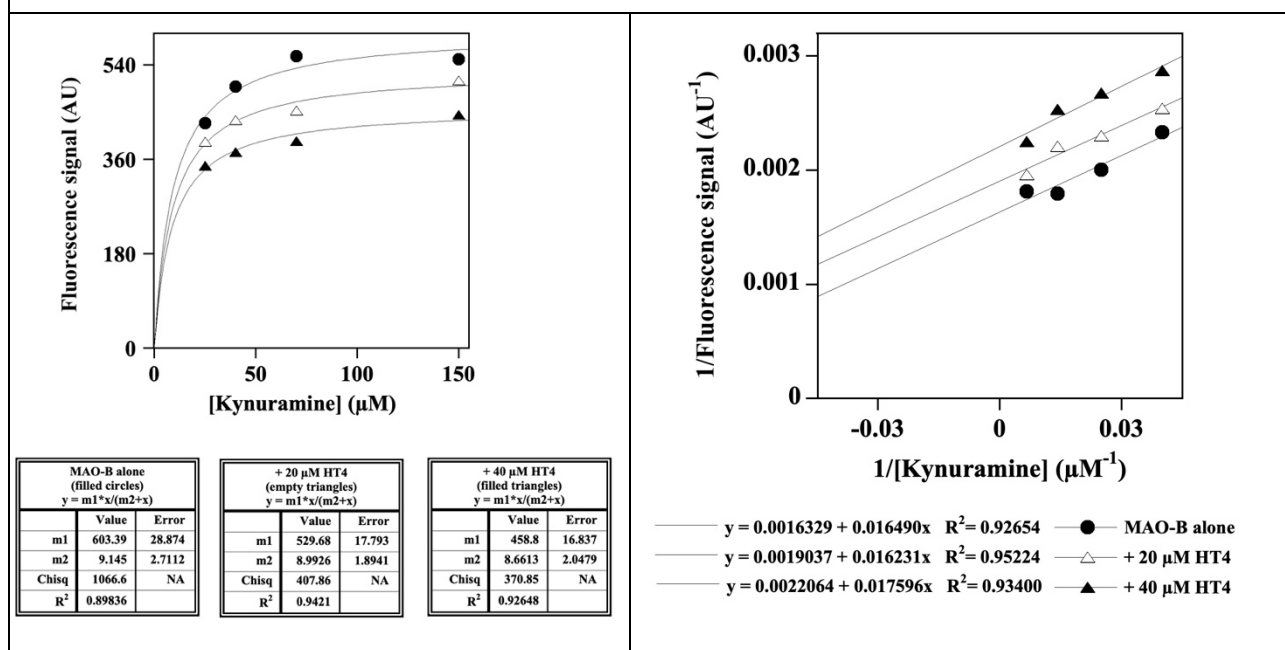

Figure S8\_A. Effect of HT4a on the kinetics data of MAO-A activity.

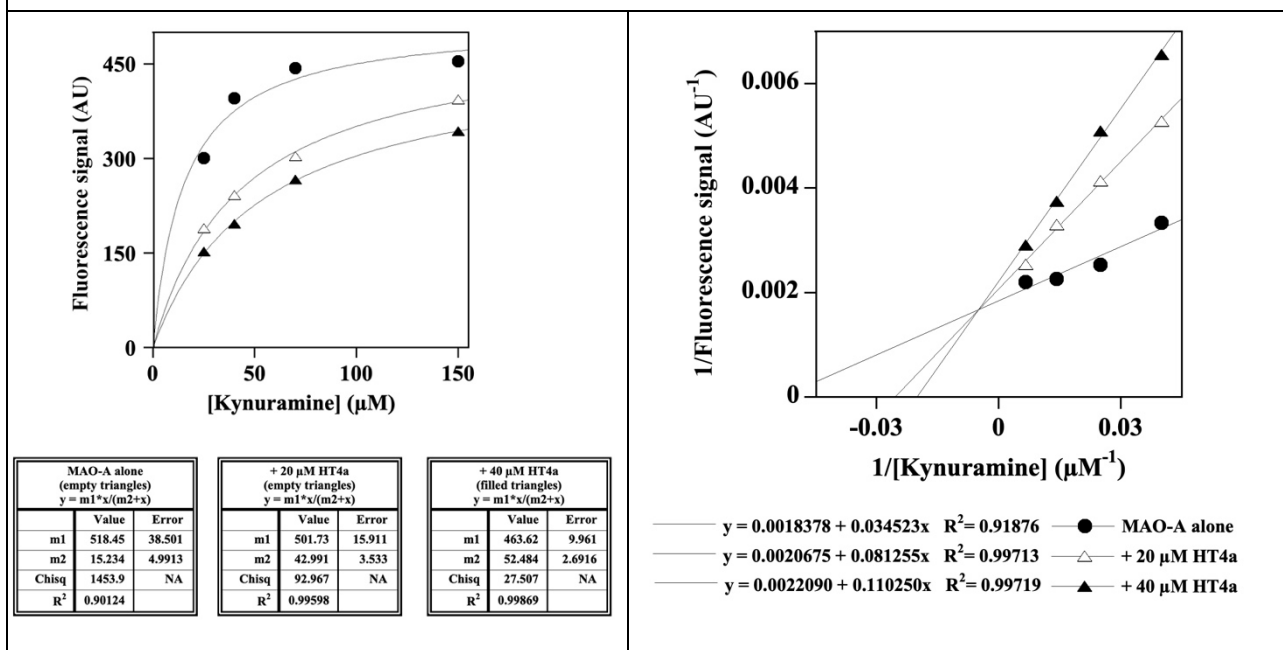

Figure S8\_B. Effect of HT4a on the kinetics data of MAO-B activity.

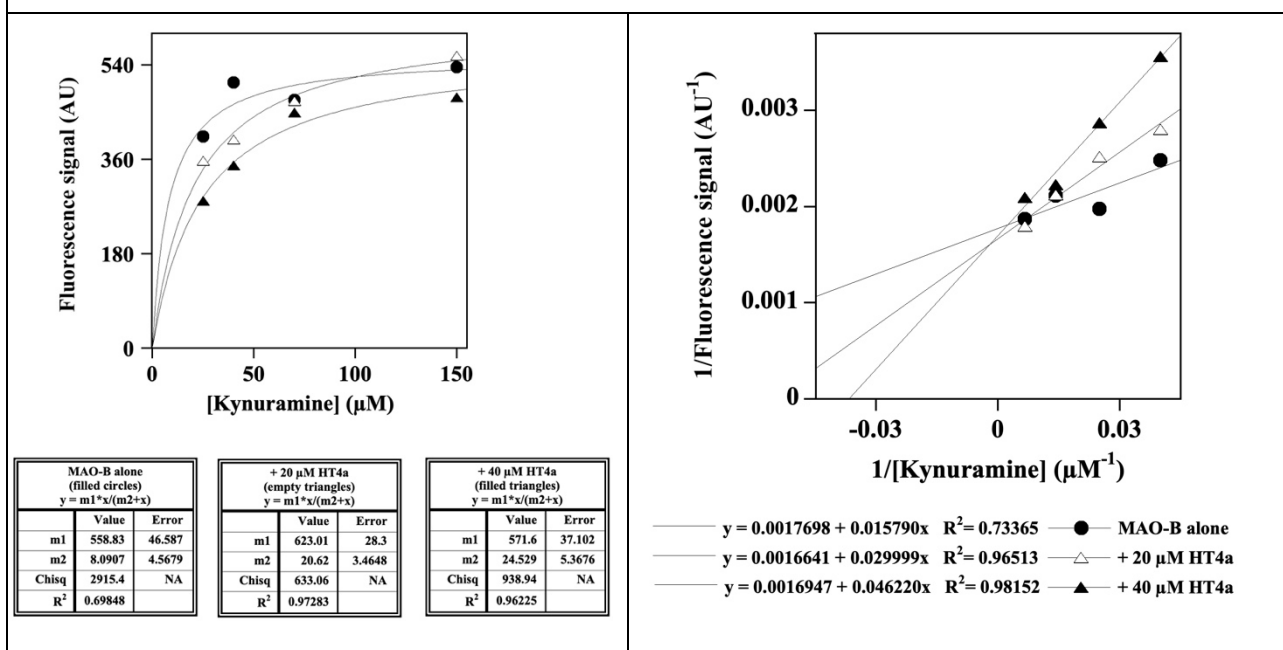

Supplement: s1 [file s1]
